# Supplementary material
Source: PubMed Central journal article supplement (PMC5468647)
Supplement: pnas.1610616114.sapp.pdf [file pnas.1610616114.sapp.pdf]

# Positive Feedback Subcircuit

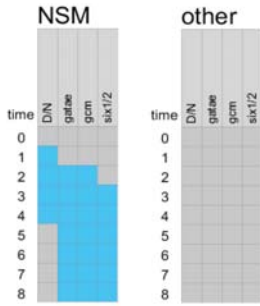

|        |                                                                 |
|--------|-----------------------------------------------------------------|
| D/N    | if <5 AND IN NSM then=1 else=0                                  |
| gatae  | if AT-1 D/N=1 OR AT-1 gcm=1 then=1 else=0                       |
| gcm    | if AT-1 D/N=1 OR [ AT-1 six1/2=1 AND AT-1 gcm=1 ] then=1 else=0 |
| six1/2 | if AT-1 gatae=1 then=1 else=0                                   |

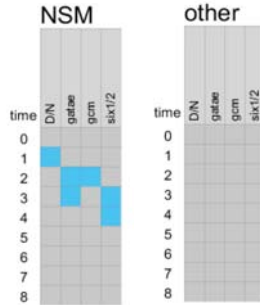

|        |                                                                 |
|--------|-----------------------------------------------------------------|
| D/N    | if <2 AND IN NSM then=1 else=0                                  |
| gatae  | if AT-1 D/N=1 OR AT-1 gcm=1 then=1 else=0                       |
| gcm    | if AT-1 D/N=1 OR [ AT-1 six1/2=1 AND AT-1 gcm=1 ] then=1 else=0 |
| six1/2 | if AT-1 gatae=1 then=1 else=0                                   |

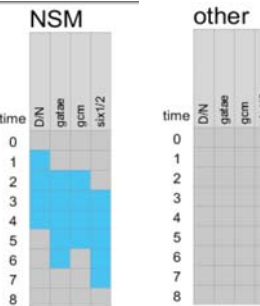

|        |                                           |
|--------|-------------------------------------------|
| D/N    | if <5 AND IN NSM then=1 else=0            |
| gatae  | if AT-1 D/N=1 OR AT-1 gcm=1 then=1 else=0 |
| gcm    | if AT-1 D/N=1 then=1 else=0               |
| six1/2 | if AT-1 gatae=1 then=1 else=0             |

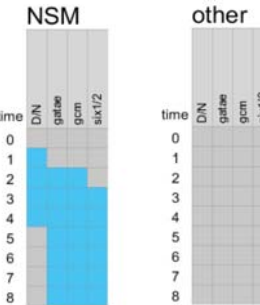

|        |                                                                |
|--------|----------------------------------------------------------------|
| D/N    | if <5 AND IN NSM then=1 else=0                                 |
| gatae  | if AT-1 D/N=1 OR AT-1 gcm=1 then=1 else=0                      |
| gcm    | if AT-1 D/N=1 OR [ AT-1 six1/2=1 OR AT-1 gcm=1 ] then=1 else=0 |
| six1/2 | if AT-1 gatae=1 then=1 else=0                                  |

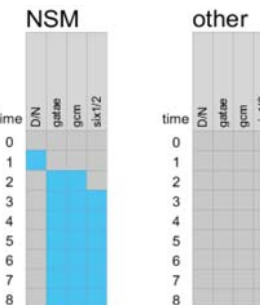

|        |                                                                |
|--------|----------------------------------------------------------------|
| D/N    | if <2 AND IN NSM then=1 else=0                                 |
| gatae  | if AT-1 D/N=1 OR AT-1 gcm=1 then=1 else=0                      |
| gcm    | if AT-1 D/N=1 OR [ AT-1 six1/2=1 OR AT-1 gcm=1 ] then=1 else=0 |
| six1/2 | if AT-1 gatae=1 then=1 else=0                                  |

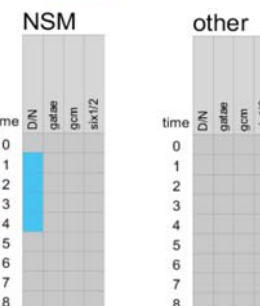

|        |                                                                  |
|--------|------------------------------------------------------------------|
| D/N    | if <5 AND IN NSM then=1 else=0                                   |
| gatae  | if AT-1 D/N=1 AND AT-1 gcm=1 then=1 else=0                       |
| gcm    | if AT-1 D/N=1 AND [ AT-1 six1/2=1 AND AT-1 gcm=1 ] then=1 else=0 |
| six1/2 | if AT-1 gatae=1 then=1 else=0                                    |

# Community Effect

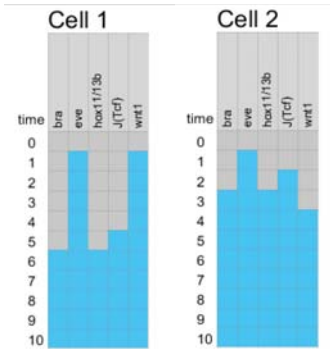

|           |                                                                                    |
|-----------|------------------------------------------------------------------------------------|
| bra       | if AT-1 hox11/13b=1 OR AT-1 J(Tcf)=1 then=1 else=0                                 |
| eve       | if >0 then=1 else=0                                                                |
| hox11/13b | if AT-1 J(Tcf)=1 AND AT-1 eve=1 then=1 else=0                                      |
| J(Tcf)    | if AT-1 wnt1=1 IN NCC_n R then=1 else=0                                            |
| wnt1      | M1 if [ <7 AND IN Cell 1 ] OR [ AT-1 hox11/13b=1 AND AT-1 J(Tcf)=1 ] then=1 else=0 |

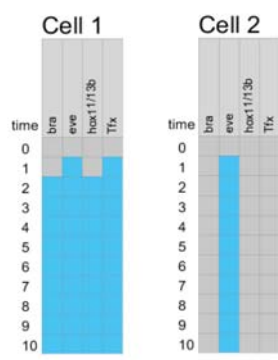

|           |                                                           |
|-----------|-----------------------------------------------------------|
| bra       | if AT-1 hox11/13b=1 OR AT-1 Tfx=1 then=1 else=0           |
| eve       | if >0 then=1 else=0                                       |
| hox11/13b | if AT-1 Tfx=1 AND AT-1 eve=1 then=1 else=0                |
| Tfx       | if [ <4 AND IN Cell 1 ] OR AT-1 hox11/13b=1 then=1 else=0 |

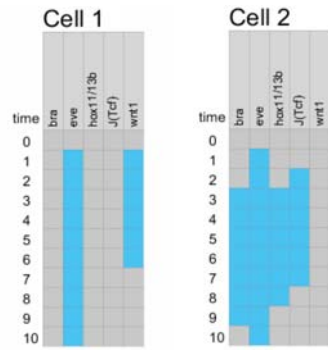

|           |                                                    |
|-----------|----------------------------------------------------|
| bra       | if AT-1 hox11/13b=1 OR AT-1 J(Tcf)=1 then=1 else=0 |
| eve       | if >0 then=1 else=0                                |
| hox11/13b | if AT-1 J(Tcf)=1 AND AT-1 eve=1 then=1 else=0      |
| J(Tcf)    | if AT-1 wnt1=1 IN NCC_n R then=1 else=0            |
| wnt1      | M1 if [ <7 AND IN Cell 1 ] then=1 else=0           |

# Coherent Feedforward

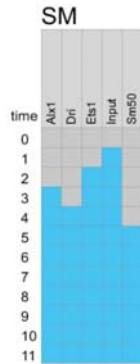

|       |                                                             |
|-------|-------------------------------------------------------------|
| Alx1  | if AT-1 Ets1=1 then=1 else=0                                |
| Dri   | if AT-1 Ets1=1 AND AT-1 Alx1=1 then=1 else=0                |
| Ets1  | if AT-1 Input=1 then=1 else=0                               |
| Input | if IN SM then=1 else=0                                      |
| Sm50  | if AT-1 Ets1=1 AND AT-1 Alx1=1 AND AT-1 Dri=1 then=1 else=0 |

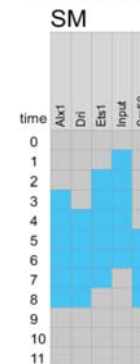

|       |                                                             |
|-------|-------------------------------------------------------------|
| Alx1  | if AT-1 Ets1=1 then=1 else=0                                |
| Dri   | if AT-1 Ets1=1 AND AT-1 Alx1=1 then=1 else=0                |
| Ets1  | if AT-1 Input=1 then=1 else=0                               |
| Input | if <7 AND IN SM then=1 else=0                               |
| Sm50  | if AT-1 Ets1=1 AND AT-1 Alx1=1 AND AT-1 Dri=1 then=1 else=0 |

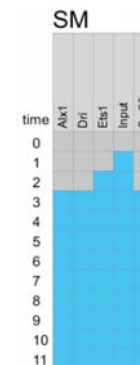

|       |                                                           |
|-------|-----------------------------------------------------------|
| Alx1  | if AT-1 Ets1=1 then=1 else=0                              |
| Dri   | if AT-1 Ets1=1 OR AT-1 Alx1=1 then=1 else=0               |
| Ets1  | if AT-1 Input=1 then=1 else=0                             |
| Input | if IN SM then=1 else=0                                    |
| Sm50  | if AT-1 Ets1=1 OR AT-1 Alx1=1 OR AT-1 Dri=1 then=1 else=0 |

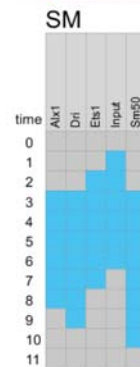

|       |                                                           |
|-------|-----------------------------------------------------------|
| Alx1  | if AT-1 Ets1=1 then=1 else=0                              |
| Dri   | if AT-1 Ets1=1 OR AT-1 Alx1=1 then=1 else=0               |
| Ets1  | if AT-1 Input=1 then=1 else=0                             |
| Input | if <7 AND IN SM then=1 else=0                             |
| Sm50  | if AT-1 Ets1=1 OR AT-1 Alx1=1 OR AT-1 Dri=1 then=1 else=0 |

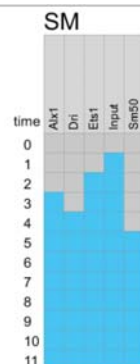

|       |                               |
|-------|-------------------------------|
| Alx1  | if AT-1 Ets1=1 then=1 else=0  |
| Dri   | if AT-1 Alx1=1 then=1 else=0  |
| Ets1  | if AT-1 Input=1 then=1 else=0 |
| Input | if IN SM then=1 else=0        |
| Sm50  | if AT-1 Dri=1 then=1 else=0   |

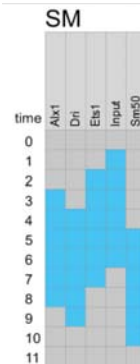

|       |                               |
|-------|-------------------------------|
| Alx1  | if AT-1 Ets1=1 then=1 else=0  |
| Dri   | if AT-1 Alx1=1 then=1 else=0  |
| Ets1  | if AT-1 Input=1 then=1 else=0 |
| Input | if <7 AND IN SM then=1 else=0 |
| Sm50  | if AT-1 Dri=1 then=1 else=0   |

## Incoherent Feedforward

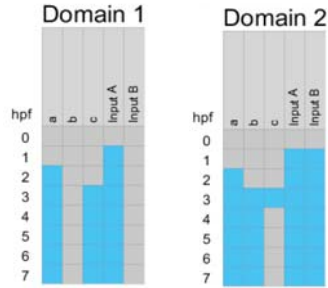

|         |                                               |
|---------|-----------------------------------------------|
| a       | if AT-1 Input A=1 then=1 else=0               |
| b       | if AT-1 Input B=1 AND AT-1 a=1 then=1 else=0  |
| c       | if AT-1 a=1 AND NOT AT-1 b=1 then=1 else=0    |
| Input A | 1 if IN Domain 1 OR IN Domain 2 then=1 else=0 |
| Input B | if IN Domain 2 then=1 else=0                  |

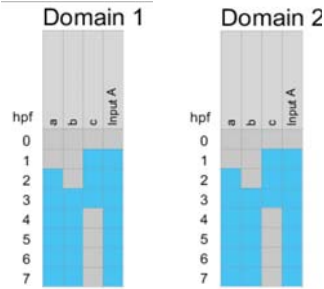

|         |                                               |
|---------|-----------------------------------------------|
| a       | if AT-1 Input A=1 then=1 else=0               |
| b       | if AT-1 a=1 then=1 else=0                     |
| c       | if NOT AT-1 b=1 then=1 else=0                 |
| Input A | 1 if IN Domain 1 OR IN Domain 2 then=1 else=0 |

## Mutual Repression

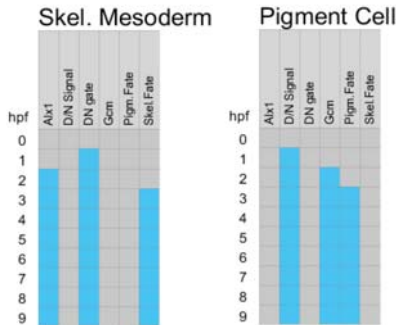

|            |                                                        |
|------------|--------------------------------------------------------|
| Alx1       | if AT-1 DN gate=1 AND NOT AT-1 Gcm=1 then=1 else=0     |
| D/N Signal | if IN Pigment Cell then=1 else=0                       |
| DN gate    | if IN Skel. Mesoderm then=1 else=0                     |
| Gcm        | if AT-1 D/N Signal=1 AND NOT AT-1 Alx1=1 then=1 else=0 |
| Pigm.Fate  | if AT-1 Gcm=1 then=1 else=0                            |
| Skel.Fate  | if AT-1 Alx1=1 then=1 else=0                           |

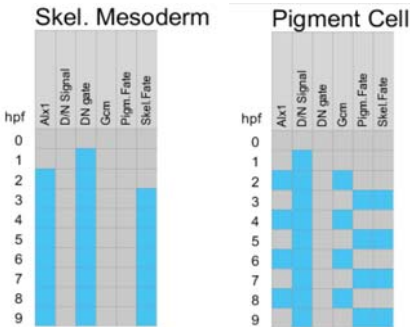

|            |                                                                         |
|------------|-------------------------------------------------------------------------|
| Alx1       | if AT-1 DN gate=1 OR AT-1 D/N Signal=1 AND NOT AT-1 Gcm=1 then=1 else=0 |
| D/N Signal | if IN Pigment Cell then=1 else=0                                        |
| DN gate    | if IN Skel. Mesoderm then=1 else=0                                      |
| Gcm        | if AT-1 D/N Signal=1 AND NOT AT-1 Alx1=1 then=1 else=0                  |
| Pigm.Fate  | if AT-1 Gcm=1 then=1 else=0                                             |
| Skel.Fate  | if AT-1 Alx1=1 then=1 else=0                                            |

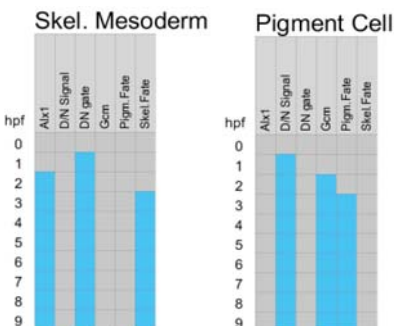

|            |                                                                         |
|------------|-------------------------------------------------------------------------|
| Alx1       | if AT-1 DN gate=1 OR AT-2 D/N Signal=1 AND NOT AT-1 Gcm=1 then=1 else=0 |
| D/N Signal | if IN Pigment Cell then=1 else=0                                        |
| DN gate    | if IN Skel. Mesoderm then=1 else=0                                      |
| Gcm        | if AT-1 D/N Signal=1 AND NOT AT-1 Alx1=1 then=1 else=0                  |
| Pigm.Fate  | if AT-1 Gcm=1 then=1 else=0                                             |
| Skel.Fate  | if AT-1 Alx1=1 then=1 else=0                                            |

## Doule Negative Gate

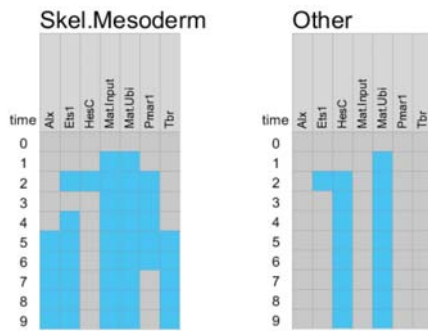

|           |                                                     |
|-----------|-----------------------------------------------------|
| Alx       | if AT-1 Ets1=1 AND NOT AT-1 HesC=1 then=1 else=0    |
| Ets1      | if AT-1 Mat.Ubi=1 AND NOT AT-1 HesC=1 then=1 else=0 |
| HesC      | if AT-1 Mat.Ubi=1 AND PERM-1 Pmar1=1 then=1 else=0  |
| Mat.Input | if IN Skel.Mesoderm then=1 else=0                   |
| Mat.Ubi   | if IN Skel.Mesoderm OR IN Other then=1 else=0       |
| Pmar1     | if AT-1 Mat.Input=1 AND <7 then=1 else=0            |
| Tbr       | if AT-1 Ets1=1 AND NOT AT-1 HesC=1 then=1 else=0    |

## Signal-mediated Toggle Switch

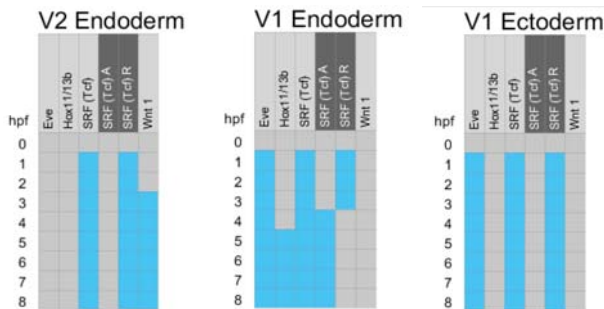

|             |                                                                              |
|-------------|------------------------------------------------------------------------------|
| Eve         | if IN V1 Endoderm OR IN V1 Ectoderm OR IN no SRF then=1 else=0               |
| Hox11/13b   | if AT-1 Eve=1 OR AT-1 SRF (Tcf) A=1 AND NOT AT-1 SRF (Tcf) R=1 then=1 else=0 |
| SRF (Tcf)   | if IN V2 Endoderm OR IN V1 Endoderm OR IN V1 Ectoderm then=1 else=0          |
| SRF (Tcf) A | if SRF (Tcf)=1 AND AT-1 Wnt 1=1 IN NCC_n R then=1 else=0                     |
| SRF (Tcf) R | if SRF (Tcf)=1 AND NOT SRF (Tcf) A=1 then=1 else=0                           |
| Wnt 1       | if >2 AND IN V2 Endoderm then=1 else=0                                       |

| Domain      | Definition             |
|-------------|------------------------|
| V1 Endoderm | NCC_n_0-10 V2 Endoderm |
|             | NCC_n_0-10 V1 Ectoderm |
|             | NCC_d_0-10 no SRF      |
| V2 Endoderm | NCC_n_0-10 V1 Endoderm |
|             | NCC_d_0-10 V1 Ectoderm |
|             | NCC_d_0-10 no SRF      |
| V1 Ectoderm | NCC_d_0-10 V2 Endoderm |
|             | NCC_n_0-10 V1 Endoderm |
|             | NCC_d_0-10 no SRF      |
| no SRF      |                        |
